# Supplementary material
Source: Research Square preprint supplement (doi:10.21203/rs.3.rs-10040145/v1)
Supplement: Supplementary file 2 [file 9131a64dfdfad89169e83214.docx]

**Supplementary File S3**

*Instrument Development: Initial Draft (German) and Final Version (English)*

| **PART 1 | Initial Draft Questionnaire (13 Items, German)** |
| --- |

**Frage 1:** Welche der folgenden Symptome erleben Sie seit Ihrer Erkrankung häufig und über die meiste Zeit?

*Bitte alle zutreffenden Symptome ankreuzen.*

- Symptomverschlechterung nach Belastung: Nach körperlicher, geistiger oder emotionaler Anstrengung treten eine deutliche Verschlechterung der Symptome sowie eine verlängerte Erholungszeit auf.
- Ständige Erschöpfung: Anhaltende körperliche und/oder geistige Müdigkeit, die unabhängig von der Tätigkeit auftritt und den Alltag einschränkt.
- Muskelschmerzen oder Brennen
- Kopfschmerzen oder Schwindel
- Übelkeit, Bauchschmerzen oder Verdauungsprobleme
- Grippeähnliche Beschwerden (z. B. Halsschmerzen, Fieber, Gliederschmerzen)
- Konzentrationsprobleme (Brain Fog)
- Gedächtnisprobleme
- Empfindlichkeit gegenüber Licht
- Empfindlichkeit gegenüber Lärm
- Kreislaufprobleme oder Schwierigkeiten beim längeren Stehen
- Unverträglichkeit oder schlechtere Verträglichkeit bestimmter Nahrungsmittel
- Nicht erholsamer Schlaf oder Schlafstörungen
- Glieder- oder Gelenkschmerzen
- Atemnot oder das Gefühl, nicht genug Luft zu bekommen
- Herzklopfen oder unregelmäßiger Herzschlag
- Empfindlichkeit gegenüber Temperaturveränderungen (z. B. Hitze/Kälte)
- Niedergeschlagene Stimmung oder erhöhte Reizbarkeit
- Andere Symptome: _______________________________

**Frage 2:** Wie stark sind Sie im Vergleich zu Ihrer Zeit vor der Erkrankung in Ihren täglichen Aktivitäten eingeschränkt?

- 0: Gar nicht eingeschränkt
- 1: Leicht eingeschränkt (gelegentliche Anpassungen nötig)
- 2: Moderat eingeschränkt (regelmäßige Anpassungen nötig, z. B. Pausen)
- 3: Stark eingeschränkt (viele Aktivitäten nicht mehr möglich)
- 4: Extrem eingeschränkt (nahezu alle Aktivitäten sind unmöglich)

**Frage 3:** Empfinden Sie die meiste Zeit eine dauerhafte Erschöpfung oder Schwäche, die unabhängig von körperlichen, geistigen oder emotionalen Aktivitäten auftritt?

☐ 1. Ja, fast immer.

☐ 2. Ja, häufig, aber nicht ständig.

☐ 3. Nein, nur gelegentlich.

☐ 4. Nein, kaum oder gar nicht.

**Frage 4:** Wenn Sie bereits erschöpft sind, führt eine Belastung zu einer zusätzlichen Verschlimmerung der Symptome (PEM), die sich deutlich von Ihrer üblichen Erschöpfung unterscheidet?

*Bitte denken Sie an die vergangenen 4 Wochen.*

☐ 0 = Kein Unterschied

☐ 1 = Leicht erkennbar

☐ 2 = Mäßig erkennbar

☐ 3 = Deutlich erkennbar

☐ 4 = Extrem klarer Unterschied

**Frage 5:** Treten nach körperlicher, geistiger oder emotionaler Belastung häufig eine unverhältnismäßig starke Verschlechterung Ihrer Symptome sowie eine verlängerte Erholungszeit auf?

☐ 1. Ja, fast immer nach Belastung.

☐ 2. Ja, häufig, aber nicht immer.

☐ 3. Ja, aber nur selten.

☐ 4. Nein, Belastungen haben keine zusätzlichen Auswirkungen.

**Frage 6:** Wie schnell haben Sie bei einer für Sie typischen anstrengenden Tätigkeit muskuläre Ermüdung verspürt? Wie stark hat Ihre Kraft nachgelassen?

*Beispiele: Treppensteigen, wiederholtes Aufstehen und Hinsetzen, Tragen eines Gegenstandes. Letzte 4 Wochen.*

☐ 0 Punkte: Keine Erschöpfung, die Aktivität bleibt jederzeit gleich durchführbar.

☐ 1 Punkt: Gelegentliche leichte Erschöpfung, bei Wiederholung selten schwerer.

☐ 2 Punkte: Häufig spürbare Erschöpfung, bei häufiger Wiederholung deutlich eingeschränkt.

☐ 3 Punkte: Sehr oft starke Erschöpfung, bei Wiederholung fast immer erhebliche Schwierigkeiten.

☐ 4 Punkte: Fast immer vollständige Erschöpfung; Aktivität kann nach wenigen Wiederholungen nicht mehr durchgeführt werden.

**Frage 7:** Treten Verschlechterungen Ihrer Symptome nach körperlicher Aktivität auf?

*Beispiele: Kurzes Gehen, Treppensteigen, leichte Hausarbeit.*

☐ Nie (0): Ich bemerke keine Verschlechterung nach körperlicher Aktivität.

☐ Selten (1): Gelegentlich merke ich eine leichte Verschlechterung.

☐ Manchmal (2): Etwa die Hälfte der Zeit bemerke ich eine deutliche Verschlechterung.

☐ Oft (3): Häufig treten Verschlechterungen nach körperlicher Aktivität auf.

☐ Immer (4): Jede körperliche Aktivität führt zu einer klaren Verschlechterung.

**Frage 8:** Treten Verschlechterungen Ihrer Symptome nach kognitiver Aktivität auf?

*Beispiele: Lesen, konzentrierte Arbeit am PC, längeres Gespräch.*

☐ Nie (0): Keine Verschlechterung.

☐ Selten (1): Leichte Verschlechterung gelegentlich.

☐ Manchmal (2): Deutliche Verschlechterung etwa die Hälfte der Zeit.

☐ Oft (3): Häufig Verschlechterungen.

☐ Immer (4): Jede kognitive Aktivität führt zu Verschlechterung.

**Frage 9:** Treten Verschlechterungen Ihrer Symptome nach emotionaler/mentaler Belastung auf?

*Beispiele: Stress, Streitgespräche, emotionale Herausforderungen.*

☐ Nie (0): Keine Verschlechterung.

☐ Selten (1): Leichte Verschlechterung gelegentlich.

☐ Manchmal (2): Deutliche Verschlechterung etwa die Hälfte der Zeit.

☐ Oft (3): Häufig Verschlechterungen.

☐ Immer (4): Jede emotionale Belastung führt zu Verschlechterung.

**Frage 10:** Verschlimmern sich alle Ihre Symptome nach einer Belastung?

*z. B. körperlich, kognitiv, emotional*

☐ Ja, alle Symptome verschlechtern sich gleichermaßen.

☐ Ja, alle Symptome verschlechtern sich, aber nicht in gleichem Maße.

☐ Nein, nur einige Symptome verschlechtern sich.

☐ Nein, nur ein Symptom verschlechtert sich.

☐ Nein, kein Symptom verschlechtert sich.

**Frage 11:** Wie lange hält die verschlimmerte Symptomphase in der Regel an?

☐ Einige Stunden

☐ Weniger als 24 Stunden

☐ 24–48 Stunden

☐ Mehrere Tage

☐ Eine Woche

☐ Mehrere Wochen

☐ Kehrt nicht zum Ausgangsniveau zurück

**Frage 12:** Wie gut können Sie sich von der Verschlechterung Ihrer Symptome erholen, wenn Sie vollständig zur Ruhe kommen?

*Bitte denken Sie an die letzten 4 Wochen.*

☐ 1. Sehr gut: Nach kurzer Zeit (wenige Stunden) bin ich vollständig erholt.

☐ 2. Gut: Ich erhole mich, aber es dauert mindestens einen Tag.

☐ 3. Mäßig: Die Erholung ist nur teilweise möglich und dauert mehrere Tage.

☐ 4. Schlecht: Es gibt nur minimale Besserung, selbst nach längerer Ruhe.

☐ 5. Gar nicht: Selbst nach kompletter Ruhe verbessert sich mein Zustand kaum oder gar nicht.

**Frage 13:** Gibt es zusätzliche Faktoren, die Ihre Symptome nach einer Belastung verstärken?

*Bitte jeden Faktor separat auf einer Skala von 0 bis 4 bewerten. Letzte 4 Wochen.*

| **Faktor** | **0 Keine Wirkung** | **1 Gering** | **2 Moderat** | **3 Deutlich** | **4 Extrem** |
| --- | --- | --- | --- | --- | --- |
| **Schlafmangel** | ☐ | ☐ | ☐ | ☐ | ☐ |
| **Stress oder emotionale Belastung** | ☐ | ☐ | ☐ | ☐ | ☐ |
| **Temperaturänderungen** | ☐ | ☐ | ☐ | ☐ | ☐ |
| **Lärm oder grelles Licht** | ☐ | ☐ | ☐ | ☐ | ☐ |
| **Stehen / orthostatische Belastungen** | ☐ | ☐ | ☐ | ☐ | ☐ |
