# Supplementary material
Source: Research Square preprint supplement (doi:10.21203/rs.3.rs-10040145/v1)
Supplement: Supplementary file 4 [file ac4ed8dbb772692a3390180e.docx]

**Supplementary File S2**

**Complete Revision Matrices: Triangulation Cycles 1 and 2 for the VPEM Questionnaire Development**

This file presents the complete revision matrices from both triangulation cycles of the V-PEM-AQ development process. Tables S2.1–S2.6 correspond to Triangulation Cycle 1 (target-group evaluation); Table S2.7 summarises all revision decisions from Triangulation Cycle 2 (expert panel evaluation). Decision categories are colour-coded: Adopted (green), Partially adopted (amber), Not adopted (red), and Noted (grey).

**S2.1 Triangulation Cycle 1: Target-Group Evaluation**

The following tables present the complete revision decisions derived from the target-group evaluation phase, organised by main qualitative category.

**Table S2.1 Conceptual revisions**

| **Subcode** | **Decision** | **Implementation / rationale** |
| --- | --- | --- |
| PEM–fatigue/exhaustion boundary | **Adopted** | PEM redefined (item 1); explicit demarcation from non-specific fatigue and exhaustion. |
| PEM–psychological symptoms boundary | **Adopted** | Psychological symptoms removed from core construct; retained only as secondary, context-dependent phenomena. |
| PEM as mechanism, not symptom list | **Adopted** | PEM conceptualised as an overarching pathophysiological mechanism of disproportionate post-exertional deterioration; symptom enumeration abandoned. |
| Inadequate symptom pattern representation | **Adopted** | Dedicated item on crash-associated additional symptoms introduced (item 5). |
| Stigmatisation risk | **Adopted** | Stigmatising terms and attributions removed throughout. |
| Heterogeneity / variability of PEM | **Partially adopted** | Severity-graded exertion matrix (item 2) and differentiated crash assessment by severity (item 3) and recovery duration (item 4) introduced. Full coverage of day-to-day fluctuations not implemented for practicability reasons. |
| Temporal characteristics (latency / duration) | **Partially adopted** | Delayed onset incorporated into definition (item 1); minimum crash duration of 14 hours specified; crash frequency (item 3) and recovery duration (item 4) systematically assessed. Explicit quantification of exact latency not implemented due to retrospective recall limitations. |
| Unclear rating scale / scoring | **Noted – complete redesign** | Scoring system fundamentally reconceived; non-linear weighting introduced. |
| Redundancy / content overlap | **Noted – major revision** | Overlapping items consolidated; item count reduced from 13 to 5. |

*Note.* "Adopted" indicates direct implementation of the feedback; "Noted – reconception/major revision" indicates that the feedback informed a broader structural or conceptual redesign rather than item-level modification.

**Table S2.2 Content additions and exclusions**

| **Subcode** | **Decision** | **Implementation / rationale** |
| --- | --- | --- |
| PEM triggers: sensory stimuli | **Adopted** | Added to exertion matrix (item 2) as "environmental stimuli". |
| PEM triggers: orthostatic load | **Adopted** | Incorporated as a distinct trigger category in the exertion matrix (item 2). |
| PEM triggers: positive emotional arousal | **Adopted** | Included as examples within the emotional/social trigger category (item 2). |
| PEM irreversibility | **Adopted** | New item added (item 4) and integrated into scoring. |
| Coping strategies / pacing | **Adopted** | Non-scored contextualisation item on pacing use added as prefatory question. |
| Screening item (PEM yes/no) | **Not adopted** | Risk of false-negative self-classification, particularly in individuals with uncertain symptom attribution, would reduce diagnostic sensitivity. |
| Medication effects on PEM | **Not adopted** | External moderating factor; not a constituent feature of PEM itself. |
| Exacerbating / associated factors | **Not adopted** | Outside primary construct scope. |
| Additional symptoms (general) | **Not adopted** | Symptom-centred extension not consistent with reconceptualised construct approach. |
| Comorbidities | **Not adopted** | Requires independent assessment instrument. |
| Social support / security | **Not adopted** | Outside primary construct scope. |
| PEM in children and adolescents | **Not adopted** | Requires separate, age-adapted instrument development. |

*Note.* Items not adopted were excluded on grounds of construct scope, instrument economy, or methodological risk as specified in the rationale column.

**Table S2.3 Linguistic revisions**

| **Subcode** | **Decision** | **Implementation / rationale** |
| --- | --- | --- |
| Inappropriate terminology | **Adopted** | Terms identified as inadequate (e.g., Erschöpfung, Müdigkeit, Schwäche) removed or replaced with construct-appropriate language. |
| Complex / contradictory wording | **Adopted** | Multi-aspect sentences simplified; contradictory phrasing resolved. |
| Vague / imprecise wording | **Adopted** | Time and frequency references standardised (hours, days, weeks); vague quantifiers replaced with anchored examples. |
| Inadequate symptom descriptors | **Noted – reconception** | Isolated single-symptom response options replaced through comprehensive reconceptualisation of item structure. |

*Note.* "Noted – reconception" indicates that the feedback was addressed through structural redesign rather than direct item-level language revision.

**Table S2.4 Structural revisions**

| **Subcode** | **Decision** | **Implementation / rationale** |
| --- | --- | --- |
| Inappropriate response format | **Partially adopted** | Response options sharpened and gradations clarified. Structured multiple-count items introduced for crash severity and recovery duration. Classical multiple-answer formats not adopted to preserve response comparability. |
| Layout and formatting | **Noted – major revision** | Readability and visual structure improved; each item presented on a separate page with increased spacing. |
| Item ordering | **Noted – major revision** | Item sequence reorganised as part of overall structural revision. |
| Item / questionnaire length | **Partially adopted** | Item count reduced from 13 to 5 core questions. Standard-format sub-scales retained in full to preserve content precision. |

*Note.* "Noted – major revision" indicates that the feedback was addressed within the overall structural reorganisation of the instrument.

**Table S2.5 Burden of completion**

| **Subcode** | **Role in revision** | **Interpretation** |
| --- | --- | --- |
| Cognitive burden | Noted – interpretation | Inherent trade-off between content precision and completion economy; item depth not reduced. |
| Emotional burden | Indirectly addressed | Conceptual ambiguities and frustrating formulations resolved through linguistic and conceptual revision. |
| Physical burden | Noted – interpretation | No structural modification; addressed through overall item reduction. |

*Note.* Burden-related feedback did not directly drive item revision but informed interpretation of findings and contextualised the overall development approach.

**Table S2.6 Positive feedback**

| **Subcode** | **Role in revision** | **Interpretation** |
| --- | --- | --- |
| Coherence and structure | Validation support | Confirms instrument coherence; aligns with high practicability ratings (F6: 92.3%, F7: 61.5%). |
| Appreciation / acknowledgement | Contextualising | Reflects acceptance of the participatory development process. |
| Feasibility | Validation support | Corroborates quantitative practicability ratings. |
| Comprehensibility | Validation support | Supports quantitative comprehensibility ratings (F5: 76.9%). |

*Note.* Positive feedback was not used to guide revision decisions but was documented as evidence of instrument acceptability and face validity.

**S2.2 Triangulation Cycle 2: Expert Panel Evaluation**

Table S2.7 summarises all revision decisions derived from the expert panel evaluation phase, including quantitative rating context, qualitative feedback, decision, and implementation rationale.

**Table S2.7 Expert panel revision decisions by dimension**

| **Dimension / item** | **Expert feedback** | **Decision** | **Implementation / rationale** |
| --- | --- | --- | --- |
| Content validity A1–A3 | Eight-week recall period rated acceptable to very suitable (63.7% categories 3–5). Alternatives of 4 and 12 weeks proposed. Earlier episodes and "ongoing decliners" noted as not captured. | **Retained** | Eight-week window retained; shorter periods risk sampling a single phase; longer periods increase recall bias. Ongoing decline acknowledged as a limitation. |
| Content validity General | Delayed onset not considered mandatory; disproportionality to exertion identified as the essential defining feature. | **Adopted** | Delayed onset reformulated as frequent but non-obligatory; disproportionality foregrounded in definition. |
| Content validity Item 2 | Social stressors recommended for inclusion as PEM triggers. | **Adopted** | Social dimension consolidated with emotional triggers (emotional/social category) in exertion matrix. |
| Comprehensibility B1–B3 | B1 reading level and short sentences recommended. "Cognitive" → "mental exertion" proposed. PEM definition described as extensive. Consistent terminology recommended. Column headers in items 3–4 considered imprecise. | **Partially adopted** | Plain-language equivalents used throughout. "Cognitive" retained but supplemented with "mental activity". Definition maintained in full scope. Terminology standardised. Column headers revised for precision. |
| Practicability C1–C3 | Addition of "none of the above" with free-text field proposed. | **Not adopted** | Free-text format would reduce standardisation and increase respondent burden; response categories confirmed as well differentiated (C3: 90.9%). |
| Methodological aspects D1–D3 | Boundary between delayed worsening and crash described as unclear. Inconsistency between ≥14-hour minimum duration (item 1) and shorter options in item 4 noted. | **Adopted** | "Crash" adopted consistently throughout. Fixed minimum duration removed from definition; inconsistency resolved. |
| Target-group specificity E1 | Severely affected individuals may be overwhelmed; two-part instrument proposed. | **Noted – not adopted** | Requires separate development and validation pathway; outside scope of present study. |

*Note.* All expert panel methodological items (D1–D3) received exclusively favourable ratings (100% categories 4–5) and required no structural modification. Items on medication effects and comorbidities were not raised by the expert panel and were confirmed as appropriately excluded from the core instrument.
